# Supplementary material
Source: PubMed Central journal article supplement (PMC2544594)
Supplement: 0806658105_0806658105SI.pdf [file 0806658105_0806658105SI.pdf]

# Supporting Information

Faulkner *et al.* 10.1073/pnas.0806658105

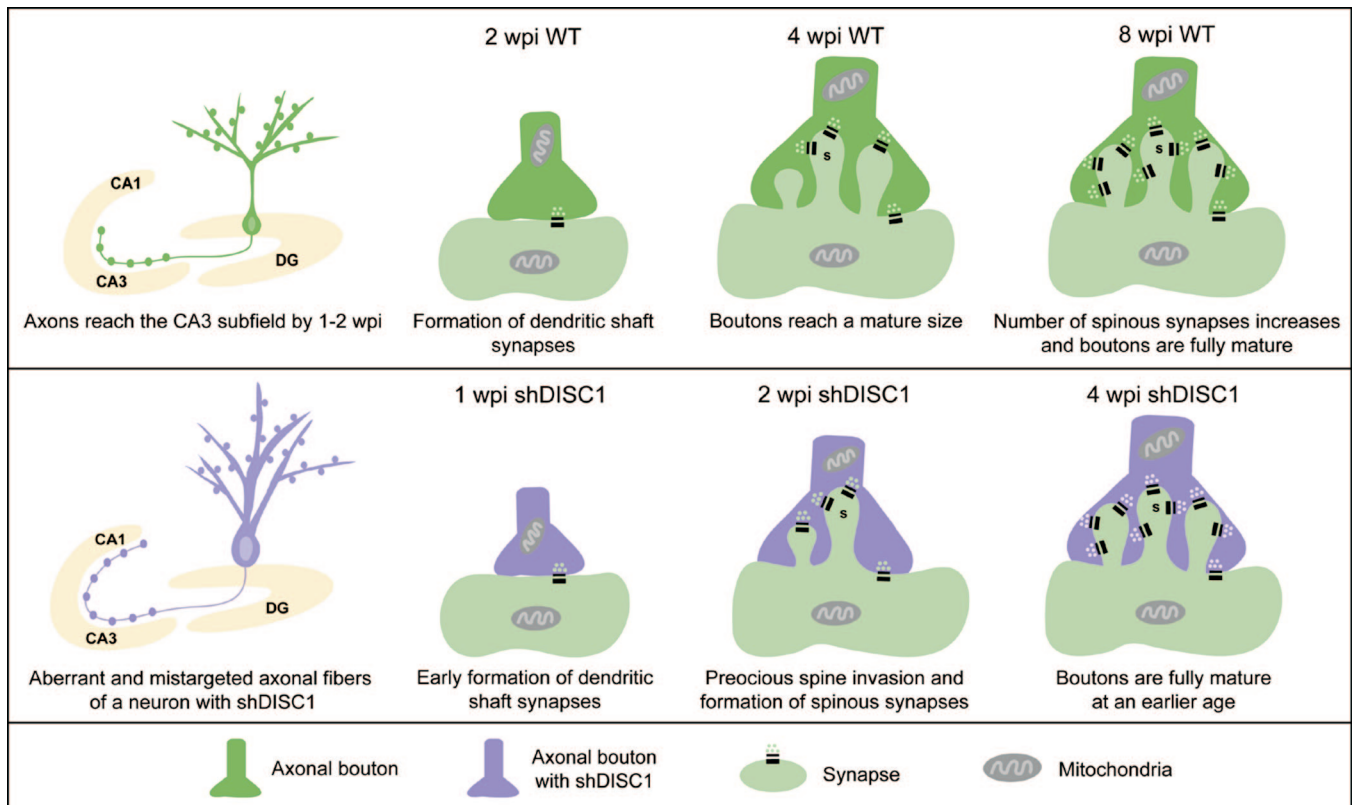

**Fig. S1.** A model for axonal development and formation of mossy fiber synaptic outputs of newborn DG cells in the adult hippocampus and the effects of DISC1 knockdown. Adult-born hippocampal granule cell mossy fibers reach the CA3 subfield and begin to form synaptic contacts with the dendritic shafts of CA3 pyramidal cells by 2 weeks. Adult-born mossy fiber boutons go through a series of development and maturation processes to reach morphologic maturity by 8 weeks. Adult-born DG cells with DISC1 knockdown (shDISC1) have mistargeted mossy fibers and an acceleration of synapse formation. These boutons begin to form synaptic contacts at 1 week and reach morphologic maturity by 4 weeks.

**Table S1. Data and statistical comparisons for bouton morphologic analysis**

|                                    | Bouton perimeter         | Shaft synapse density | Spine synapse density | Spine density            | Synapses per spine       |
|------------------------------------|--------------------------|-----------------------|-----------------------|--------------------------|--------------------------|
| 1.5 wpi WT ( <i>n</i> = 4)         | 4.88 ± 0.46*             | 0.00                  | 0.00*                 | 0.00*                    | 0.00*                    |
| 2 wpi WT ( <i>n</i> = 8)           | 6.91 ± 0.65*             | 0.25 ± 0.14           | 0.00*                 | 0.00*                    | 0.00*                    |
| 4 wpi WT ( <i>n</i> = 8)           | 12.33 ± 1.58             | 0.12 ± 0.08           | 0.39 ± 0.07*          | 0.43 ± 0.17              | 1.33 ± 0.26 <sup>†</sup> |
| 8 wpi WT ( <i>n</i> = 8)           | 11.31 ± 1.25             | 0.14 ± 0.07           | 0.65 ± 0.14           | 0.31 ± 0.07              | 2.25 ± 0.27              |
| 16 wpi WT ( <i>n</i> = 6)          | 11.72 ± 1.47             | 0.00                  | 0.61 ± 0.13           | 0.28 ± 0.08              | 2.54 ± 0.34              |
| Unlabeled control ( <i>n</i> = 12) | 11.72 ± 0.66             | 0.02 ± 0.02           | 0.88 ± 0.07           | 0.40 ± 0.05              | 2.45 ± 0.26              |
| 1 wpi shDISC1 ( <i>n</i> = 5)      | 4.10 ± 0.87*             | 0.20 ± 0.20           | 0.00*                 | 0.00*                    | 0.00*                    |
| 1.5 wpi shDISC1 ( <i>n</i> = 7)    | 6.65 ± 0.64*             | 0.18 ± 0.06           | 0.11 ± 0.09*          | 0.11 ± 0.09 <sup>†</sup> | 0.29 ± 0.18*             |
| 2 wpi shDISC1 ( <i>n</i> = 7)      | 8.67 ± 0.80 <sup>†</sup> | 0.09 ± 0.05           | 0.34 ± 0.11*          | 0.22 ± 0.07              | 1.18 ± 0.40 <sup>†</sup> |
| 4 wpi shDISC1 ( <i>n</i> = 4)      | 12.54 ± 3.23             | 0.04 ± 0.02           | 0.57 ± 0.18           | 0.26 ± 0.09              | 2.27 ± 0.33              |
| 8 wpi shDISC1 ( <i>n</i> = 11)     | 11.47 ± 1.52             | 0.05 ± 0.02           | 0.42 ± 0.06*          | 0.23 ± 0.04              | 2.68 ± 0.78              |
| 16 wpi shDISC1 ( <i>n</i> = 10)    | 12.20 ± 1.03             | 0.07 ± 0.03           | 0.63 ± 0.12           | 0.35 ± 0.06              | 2.27 ± 0.32              |
| 2 wpi shDISC1 CA1 ( <i>n</i> = 3)  | 5.86 ± 0.17 <sup>‡</sup> | 0.00                  | 0.00                  | 0.00                     | 0.00                     |

For all WT and DISC1 knockdown (shDISC1) boutons analyzed, the mean value ± SEM for each parameter is given. Values for WT and shDISC1 were compared with the control at each time point.

\**P* < 0.01 vs. control.

<sup>†</sup>*P* < 0.05 vs. control.

<sup>‡</sup>*P* < 0.05 vs. 2 wpi shDISC1.
